# Supplementary material for: Human Antimicrobial Peptide Hepcidin 25-Induced Apoptosis in Candida albicans
Source: MDPI journal article supplement (doi:10.3390/microorganisms8040585), 2020-04-17
Supplement: s1 [file s1]

**Table S1.** Clinical isolates of *Candida* spp. used in this study.

| <i>Candida</i> spp.    | Source <sup>a</sup> | Strain <sup>b</sup> |
|------------------------|---------------------|---------------------|
| <i>C. albicans</i>     | ATCC MYA-2876       | SC5314              |
| <i>C. albicans</i>     | ATCC90028           | YLO12               |
| <i>C. albicans</i>     | HIV patient         | YH050001            |
| <i>C. albicans</i>     | HIV patient         | YH050005            |
| <i>C. albicans</i>     | HIV patient         | YH050072            |
| <i>C. glabrata</i>     | ATCC9003            | YLO8                |
| <i>C. glabrata</i>     | HIV patient         | YH050105            |
| <i>C. krusei</i>       | ATCC6258            | YLO6                |
| <i>C. krusei</i>       | HIV patient         | YH050075            |
| <i>C. tropicalis</i>   | ATCC13803           | YLO86               |
| <i>C. tropicalis</i>   | HIV patient         | YH050007            |
| <i>C. tropicalis</i>   | HIV patient         | YH050013            |
| <i>C. tropicalis</i>   | HIV patient         | YH050114            |
| <i>C. parapsilosis</i> | ATCC22019           | YLO7                |
| <i>C. dubliniensis</i> | HIV patient         | YH050092            |

<sup>a</sup> HIV patient, *Candida* strains isolated from HIV-infected patients.

<sup>b</sup> These strains were provided by Hsiu-Jung Lo (Yu et al., Antimicrob Agents Chemother. 2011, 55:4918-4921).

**Table S2.** Minimal fungicidal concentrations (MFCs) of hep 25 against *C. albicans* and non-*albicans Candida* clinical isolates.

| <i>Candida spp.</i>    | Source        | Strain   | MFCs (µg/ml) <sup>a</sup> |
|------------------------|---------------|----------|---------------------------|
| <i>C. albicans</i>     | ATCC MYA-2876 | SC5314   | 100                       |
| <i>C. albicans</i>     | ATCC90028     | YLO12    | >50                       |
| <i>C. albicans</i>     | HIV patient   | YH050001 | >50                       |
| <i>C. albicans</i>     | HIV patient   | YH050005 | >50                       |
| <i>C. albicans</i>     | HIV patient   | YH050072 | >50                       |
| <i>C. glabrata</i>     | ATCC9003      | YLO8     | 50                        |
| <i>C. glabrata</i>     | HIV patient   | YH050105 | 50                        |
| <i>C. krusei</i>       | ATCC6258      | YLO6     | 25                        |
| <i>C. krusei</i>       | HIV patient   | YH050075 | 25                        |
| <i>C. tropicalis</i>   | ATCC13803     | YLO86    | 25                        |
| <i>C. tropicalis</i>   | HIV patient   | YH050007 | 25                        |
| <i>C. tropicalis</i>   | HIV patient   | YH050013 | 25                        |
| <i>C. tropicalis</i>   | HIV patient   | YH050114 | 50                        |
| <i>C. parapsilosis</i> | ATCC22019     | YLO7     | 25                        |
| <i>C. dubliniensis</i> | HIV patient   | YH050092 | 50                        |

<sup>a</sup>The MFCs were defined as the lowest drug concentration that killed  $\geq 99.9\%$  of cells and determined according to Basso et al. ( Antimicrob Agents Chemother. 2018, 62(6)) with some modifications.

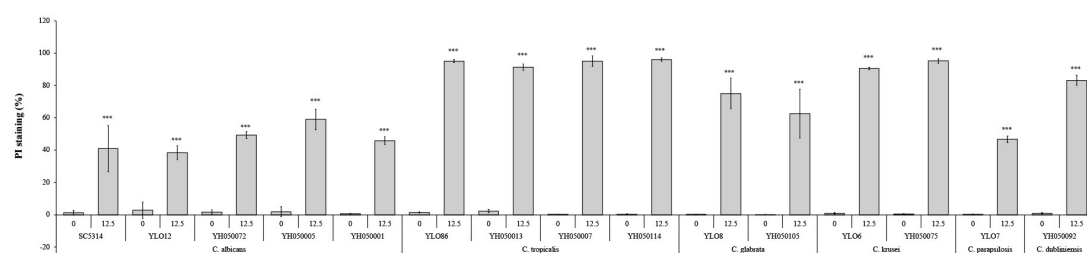

**Figure S1.** The activity of hep 25 against various clinical isolates of *C. albicans* and non-*albicans* *Candida* spp. The cells killed by hep 25 (PI-positive cells) were quantified by flow cytometry and normalized to the number of control cells (without hep 25 treatment) and reported as a percentage. 0: cells without hep 25 treatment, 12.5: cells with 12.5 µg/ml hep 25 treatment. The results are presented as the mean  $\pm$  standard deviation of three independent experiments; \*\*\*  $P < 0.001$ .

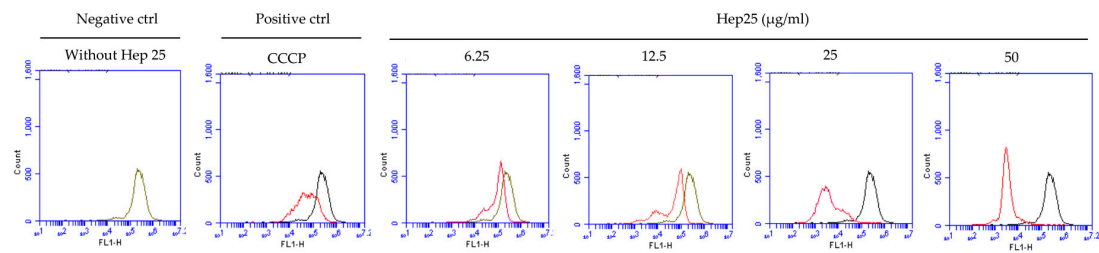

**Figure S2.** Mitochondrial depolarization detected with DiOC6(3). Cells treated with various concentrations of hep 25 or with 50  $\mu$ M of CCCP (red line) had decreased MMP fluorescence intensity compared to that of the untreated cells (black line). The results shown are from one of the three independent experiments.

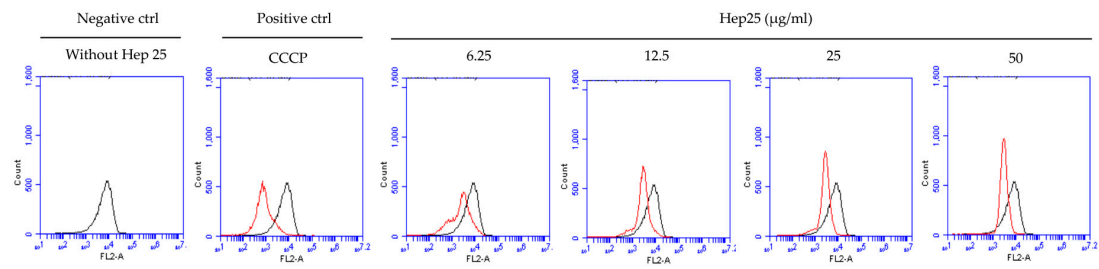

**Figure S3.** Mitochondrial depolarization detected by TMRM. Cells treated with various concentrations of hep 25 or with 50  $\mu$ M CCCP (red line) had a decreased MMP fluorescence intensity compared to that of the untreated cells (black line). The results shown are from one of the three independent experiment.

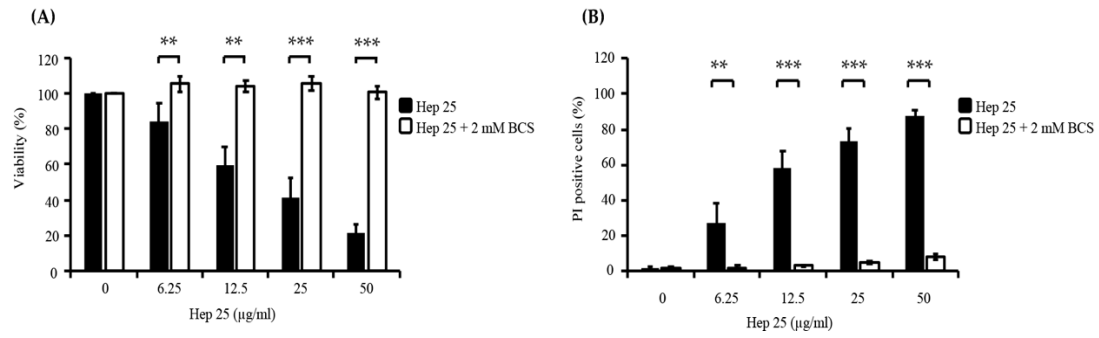

**Figure S4.** The effect of 2mM BCS on the candidacidal activity of hep 25. (A) Killing of *C. albicans* cells by hep 25 cotreated with or without 2 mM BCS was determined by the number of CFUs and expressed as the percentage of viable cells; **\*\* P < 0.01 and \*\*\* P < 0.001.** (B) The killing activity of hep 25 with or without 2 mM BCS was detected by PI staining. The cells killed by hep 25 with or without 2 mM BCS were quantified by flow cytometry and reported as a percentage. The results are presented as the mean  $\pm$  standard deviation of three independent experiments; **\*\* P < 0.01 and \*\*\* P < 0.001.**
